# Supplementary material for: Cyclophilin A-regulated ubiquitination is critical for RIG-I-mediated antiviral immune responses
Source: eLife. 2017 Jun 8;6:e24425. doi: 10.7554/eLife.24425 (PMC5484619; doi:10.7554/eLife.24425)
Supplement: Figure 1—source data 1. — DOI: http://dx.doi.org/10.7554/eLife.24425.004 [file elife-24425-fig1-data1.xls]

## Sheet: Figure 1A
SeV titer
	day	HA units					MEAN	SD	p
293T/CypA+	1	0	0	0	0	0
	2	4	2	2	2	4	2.8	1.09545	0.00392493
	3	16	8	8	8	8	9.6	3.57771	0.00560487
	4	16	16	16	16	32	19.2	7.15542	0.00184051
	5	16	16	16	8	16	14.4	3.57771	0.00758662
293T/CypA-	1	0	0	0	0	0	0	0
	2	16	16	16	16	8	14.4	3.57771
	3	128	128	64	64	64	89.6	35.0542
	4	256	256	256	256	128	230.4	57.2433
	5	128	64	128	64	64	89.6	35.0542

## Sheet: Figure 1B
VSV titer
	h	293T/CypA-				293T/CypA+
TCID50	24	6.33	6.5	6.33		5	5.23	5
	12	6.23	6	6.23		4.23	4.33	4
	6	4.23	4	4		2	2.23	1.77
	0	0	0	0		0	0	0
	h	293T/CypA-				293T/CypA+
Dilution fold	24	10^6.33	10^6.50	10^6.33		10^5.00	10^5.23	10^5.00
	12	10^6.23	10^6.00	10^6.23		10^4.23	10^4.33	10^4.00
	6	10^4.23	10^4.00	10^4.00		10^2.00	10^2.23	10^1.77
	0	10^0	10^0	10^0		10^0	10^0	10^0
Dilution fold	24	2.13796e+06	3.16228e+06	2.13796e+06		100000	169824	100000
	12	1.69824e+06	1000000	1.69824e+06		16982.4	21379.6	10000
	6	16982.4	10000	10000		100	169.824	58.8844
	0	1	1	1		1	1	1
		AVERAGE	SD	p
		2.4794e+06	482867	0.0177509		123275	32915.5
		1.4655e+06	329155	0.0253758		16120.7	4685.5
		12327.5	3291.55	0.0345668		109.57	45.7938
		1	0			1	0

## Sheet: Figure 1C
SeV M mRNA
SeV M	h		Ct	Ct	Ct		Ct-Ct0	Ct-Ct0	Ct-Ct0	average					power 2			p	mean	SD
WT	0		40	40	40		19.0985	19.0985	19.0985	19.0985	0	0	0		1	1	1		1	0
	6		27.1252	26.7273	27.0648		12.9426	12.5448	12.8823		6.15587	6.55373	6.21623		71.3019	93.9437	74.3483		79.8646	12.2876
	12		26.0954	27.9425	26.1346		10.6204	12.4675	10.6596		8.47805	6.63099	8.43886		356.571	99.1121	347.016	0.207848	267.566	145.964
	24		30.3144	30.0089	30.436		9.92357	9.61806	10.0452		9.17492	9.48042	9.05328		577.996	714.318	531.261	0.00659879	607.858	95.1119
Ppia-/-	0		40	40	40		26.8418	26.8418	26.8418		-7.74335	-7.74335	-7.74335		0.0046668	0.0046668	0.0046668		0.0046668	0
	6		24.5107	24.8746	24.3435		11.9536	12.3174	11.7864		7.14491	6.78106	7.31206		141.525	109.977	158.91		136.804	24.8057
	12		23.6118	23.5827	24.0577		9.74471	9.71556	10.1906		9.35378	9.38292	8.90788		654.285	667.639	480.329		600.751	104.502
	24		31.4649	31.3397	31.2162		8.03772	7.91251	7.78899		11.0608	11.186	11.3095		2136.1	2329.78	2538.03		2334.64	201.007
ACTIN						AVERAGE
WT	0		20.7079	21.2453	20.7513	20.9015
	6		14.4483	14.0863	14.013	14.1825
	12		15.5275	15.4467	15.4508	15.475
	24		20.3784	20.3593	20.4348	20.3908
Ppia-/-	0		12.8117	13.6964	12.9664	13.1582
	6		12.4649	12.702	12.5044	12.5571
	12		13.8402	13.8918	13.8693	13.8671
	24		23.5701	23.3688	23.3427	23.4272

## Sheet: Figure 1D
IFN-β-luc
			293T/CypA+			293T/CypA-							β-gal				average
		Mock	2022343	2148524	2045434	602114	653114	664772				1	0.0722	0.0734	0.0734	0.0764	0.07385
		SeV	7311527296	6786807296	7388455904	4041191684	3816550976	3015253568				1	0.0893	0.0926	0.0931	0.092	0.09175
		VSV	940853641	1106691286	962674459	418447815	408133144	370055921				1	0.1041	0.105	0.1063	0.1091	0.106125
		TpIC	567645471	656691471	553200551	238780147	271012143	248489737				1	0.0967	0.0957	0.096	0.0969	0.096325
		IAV	385402362	359234945	359224166	181694556	200039712	154928722				1	0.112	0.1128	0.1132	0.1148	0.1132
												1	0.0914	0.0921	0.0924	0.0898	0.091425
									AVERAGE			2	0.126	0.129	0.131	0.124	0.1275
		Mock/β-gal	2.73845e+07	2.34172e+07	1.92738e+07	6.25086e+06	5.76956e+06	7.27123e+06	2.33585e+07			2	0.1	0.104	0.103	0.118	0.10625
		SeV/β-gal	5.73453e+10	6.38758e+10	5.6293e+10	2.38067e+10	2.64579e+10	2.3649e+10				2	0.134	0.131	0.124	0.136	0.13125
		VSV/β-gal	5.26352e+09	5.8094e+09	4.83149e+09	1.76934e+09	1.85726e+09	1.49972e+09				2	0.173	0.166	0.166	0.174	0.16975
		TpIC/β-gal	4.46965e+09	4.20956e+09	3.38349e+09	1.25674e+09	1.32524e+09	1.32528e+09				2	0.138	0.142	0.148	0.149	0.14425
		IAV/β-gal	2.67641e+09	2.2629e+09	2.87955e+09	8.4904e+08	1.09912e+09	1.07777e+09				2	0.126	0.129	0.131	0.124	0.1275
												3	0.174	0.183	0.177	0.181	0.17875
	fold	Mock	1.17236	1.00251	0.825132	0.267606	0.247001	0.311289				3	0.189	0.192	0.182	0.199	0.1905
		SeV	2455.01	2734.59	2409.96	1019.19	1132.69	1012.44				3	0.209	0.188	0.193	0.207	0.19925
		VSV	225.336	248.706	206.841	75.747	79.5112	64.2045				3	0.234	0.231	0.237	0.244	0.2365
		TpIC	191.35	180.216	144.851	53.8022	56.735	56.7365				3	0.23	0.234	0.209	0.206	0.21975
		IAV	114.58	96.8769	123.277	36.3483	47.0544	46.1402				3	0.228	0.238	0.292	0.229	0.24675
	Average	Mock	1	0.275298								4	0.122	0.126	0.129	0.131	0.127
		SeV	2533.19	1054.77								4	0.154	0.161	0.152	0.157	0.156
		VSV	226.961	73.1543								4	0.166	0.156	0.164	0.168	0.1635
		TpIC	172.139	55.7579								4	0.189	0.194	0.189	0.188	0.19
		IAV	111.578	43.181								4	0.197	0.208	0.203	0.21	0.2045
												4	0.179	0.189	0.189	0.193	0.1875
	SD	Mock	0.173626	0.0328271								5	0.14	0.147	0.145	0.144	0.144
		SeV	175.868	67.5618								5	0.145	0.168	0.16	0.162	0.15875
		VSV	20.98	7.97594								5	0.121	0.126	0.124	0.128	0.12475
		TpIC	24.2792	1.69368								5	0.204	0.215	0.218	0.219	0.214
		IAV	13.4534	5.93492								5	0.172	0.187	0.185	0.184	0.182
												5	0.137	0.146	0.144	0.148	0.14375
	p	Mock	0.0238195
		SeV	0.00179524
		VSV	0.00266206
		TpIC	0.015593
		IAV	0.0179625

## Sheet: Figure 1E1
ifnb1
ifnb1-SeV			Ct	Ct	Ct		Ct-Ct0	Ct-Ct0	Ct-Ct0	average	#NAME?				power 2			p	mean	SD
	WT	Mokc	31.7837	31.9042	31.8508		16.4897	16.6102	16.5568	16.5522	0.0625604	-0.0579516	-0.00460879		1.04432	0.960627	0.996811		1.00059	0.0419727
		SeV	19.4325	19.3224	19.4994		3.56345	3.45339	3.63043		12.9888	13.0989	12.9218		8128.58	8772.98	7759.82	0.00103535	8220.46	512.791
	Ppia-/-	Mock	31.1863	31.5332	31.1807		16.0775	16.4244	16.0719		0.474734	0.127854	0.480378		1.38966	1.09267	1.39511		1.29248	0.173064
		SeV	21.6669	21.1678	21.4628		6.91801	6.41887	6.7139		9.63422	10.1334	9.83834		794.677	1123.18	915.449		944.435	166.159
ACTIN
	WT	Mock	15.1628	15.4901	15.2292	15.294
		SeV	15.9417	15.8173	15.8483	15.8691
	Ppia-/-	Mock	15.0254	15.1066	15.1945	15.1088
		SeV	14.6026	14.8429	14.8012	14.7489
ifnb1-VSV
	WT	Mock	28.3912	28.6388	28.6184		9.825	10.0726	10.0521	9.98324	0.158241	-0.0893478	-0.0688934		1.11593	0.939948	0.953369		1.00308	0.0979569
		VSV	20.1872	20.0942	20.1383		2.45417	2.36112	2.40525		7.52907	7.62212	7.57799		184.704	197.009	191.074	0.00190515	190.929	6.15409
		Mock	25.6905	25.9678	25.9467		9.71874	9.99599	9.97489		0.264503	-0.0127506	0.00835037		1.20122	0.991201	1.0058		1.06608	0.117268
		VSV	20.3339	20.5619	20.3747		4.15365	4.3817	4.1945		5.82959	5.60154	5.78874		56.8696	48.5546	55.2822		53.5688	4.41436
ACTIN	WT	Mock	18.8354	18.3834	18.4799	18.5662
		VSV	18.7927	17.1258	17.2806	17.7331
	Ppia-/-	Mock	15.9431	15.9503	16.0219	15.9718
		VSV	16.0854	16.4788	15.9765	16.1802
ifnb1-IAV
	WT	Mock	27.3786	27.1987	27.2259		10.1344	9.95449	9.98167	10.0235	-0.11087	0.069025	0.0418453		0.926029	1.04901	1.02943		1.00149	0.066079
		IAV	21.7401	21.7486	21.3124		4.50638	4.51487	4.07875		5.51713	5.50864	5.94477		45.7955	45.5268	61.5963	0.0120199	50.9729	9.20116
	Ppia-/-	Mock	26.9311	26.8683	26.8653		9.92408	9.86126	9.85821		0.0994342	0.162263	0.165314		1.07135	1.11904	1.12141		1.10393	0.0282414
		IAV	24.9842	25.0734	24.9808		8.27843	8.36764	8.27504		1.74509	1.65588	1.74847		3.35216	3.15115	3.36003		3.28778	0.118389
ACTIN	WT	Mock	17.1778	17.3811	17.1736	17.2442
		IAV	17.3265	17.148	17.2265	17.2337
	Ppia-/-	Mock	17.2346	16.8914	16.8952	17.0071
		IAV	16.8856	16.5131	16.7185	16.7057

## Sheet: Figure 1E2
ifna
ifna-SeV			Ct	Ct	Ct		Ct-Ct0	Ct-Ct0	Ct-Ct0	average	#NAME?				power 2			p	mean	SD
	WT	Mokc	35.6066	34.0209	34.1608		20.3126	18.7269	18.8668	19.3021	-1.01047	0.575181	0.435289		0.496384	1.48986	1.35218		1.11281	0.538261
		SeV	24.8482	24.9114	24.7887		8.97921	9.04239	8.91974		10.3229	10.2597	10.3824		1280.86	1225.97	1334.76	0.00117828	1280.53	54.392
	Ppia-/-	Mock	34.0812	34.159	34.0084		18.9724	19.0501	18.8996		0.329752	0.251966	0.402488		1.2568	1.19083	1.32179		1.25647	0.0654789
		SeV	26.5253	26.5528	26.7386		11.7764	11.8039	11.9897		7.5257	7.49824	7.31244		184.273	180.798	158.951		174.674	13.7269
ACTIN
	WT	Mock	15.1628	15.4901	15.2292	15.294
		SeV	15.9417	15.8173	15.8483	15.8691
	Ppia-/-	Mock	15.0254	15.1066	15.1945	15.1088
		SeV	14.6026	14.8429	14.8012	14.7489
ifna-VSV
	WT	Mock	30.3398	30.3604	30.6539		11.7736	11.7942	12.0877	11.8852	0.111551	0.0909653	-0.202517		1.08039	1.06508	0.869033		1.00484	0.117857
		VSV	23.8671	23.9044	23.7397		6.13407	6.17138	6.00667		5.75111	5.7138	5.87851		53.8587	52.4837	58.8314	0.00254734	55.0579	3.33945
		Mock	28.0228	28.2972	28.0781		12.051	12.3254	12.1063		-0.165805	-0.440235	-0.221145		0.891431	0.737014	0.857884		0.828776	0.0812191
		VSV	24.7601	24.6882	24.875		8.57992	8.50797	8.69481		3.30526	3.37721	3.19037		9.88512	10.3906	9.12843		9.80138	0.635237
ACTIN	WT	Mock	18.8354	18.3834	18.4799	18.5662
		VSV	18.7927	17.1258	17.2806	17.7331
	Ppia-/-	Mock	15.9431	15.9503	16.0219	15.9718
		VSV	16.0854	16.4788	15.9765	16.1802
ifna-IAV
	WT	Mock	26.3382	26.3959	26.1663		9.09397	9.15174	8.92212	9.05594	-0.03803	-0.0957998	0.13383		0.973984	0.935753	1.0972		1.00231	0.0843704
		IAV	22.8827	22.2088	22.8988		5.64905	4.97511	5.66506		3.40689	4.08084	3.39088		10.6066	16.9221	10.4896	0.0354061	12.6728	3.68052
	Ppia-/-	Mock	26.2581	26.182	26.085		9.25105	9.17499	9.07794		-0.195104	-0.119042	-0.0219965		0.87351	0.920799	0.984869		0.926393	0.0558897
		IAV	25.2179	25.4715	25.3044		8.51221	8.76579	8.59866		0.543736	0.290156	0.457287		1.45774	1.22277	1.37296		1.35116	0.118992
ACTIN	WT	Mock	17.1778	17.3811	17.1736	17.2442
		IAV	17.3265	17.148	17.2265	17.2337
	Ppia-/-	Mock	17.2346	16.8914	16.8952	17.0071
		IAV	16.8856	16.5131	16.7185	16.7057

## Sheet: Figure 1F1
IFN-β
			Standard				pg/ml
				0.055	0.056	0.0555	0
				0.289	0.309	0.299	50
				0.589	0.609	0.599	100
				0.917	0.901	0.909	200
				1.765	1.748	1.7565	400
				2.671	2.688	2.6795	1000
				3.653	3.676	3.6645	2000
				5.12	5.126	5.123	4000
			OD			OD-BLANK			Con.(pg/ml)			AVERAGE	SD	p
		WT-Mock	0.39	0.387	0.381	0.3394	0.3364	0.3304	49.937	49.8002	49.5352	49.7575	0.204279	0.0673063
		WT-SeV	1.326	1.364	1.463	1.2754	1.3134	1.4124	233.637	247.033	284.109	254.926	26.1457	0.00709811
		Ppia-/--Mock	0.17	0.157	0.132	0.1194	0.1064	0.0814	47.5628	47.9085	48.7257	48.0657	0.597151
		Ppia-/--SeV	0.589	0.522	0.534	0.5384	0.4714	0.4834	65.4623	58.8162	59.9007	61.3931	3.5655

## Sheet: Figure 1F2
IFN-α
			Standard				pg/ml
				0.07	0.068	0.069	0
				0.131	0.123	0.127	12.5
				0.203	0.217	0.21	25
				0.396	0.399	0.3975	50
				0.877	0.834	0.8555	100
				1.984	2.026	2.005	200
				3.831	3.798	3.8145	400
			OD			OD-BLANK			Con.(pg/ml)			AVERAGE	SD	p
		WT-Mock	0.09	0.087	0.093	0.02	0.017	0.023	4.02293	3.71506	4.3308	4.02293	0.307869	0.0945346
		WT-SeV	1.149	1.423	1.211	1.079	1.353	1.141	113.063	141.393	119.469	124.641	14.8566	0.0395382
		Ppia-/--Mock	0.068	0.077	0.057	-0.002	0.007	-0.013	1.76538	2.68889	0.636725	1.697	1.02779
		Ppia-/--SeV	0.787	0.723	0.773	0.717	0.653	0.703	75.7079	69.1126	74.265	73.0285	3.46717

## Sheet: Figure 1G1
Ifit1 mRNA
	Ct	Ct	Ct		Ct-Ct0	Ct-Ct0	Ct-Ct0	average	#NAME?				power 2			p	mean	SD
WT-Mock	25.7399	25.8327	25.4814		10.4459	10.5387	10.1874	10.3907	-0.055201	-0.148079	0.203266		0.96246	0.902451	1.1513	0.0516248	1.0054	0.129864
WT-SeV	14.9206	14.8492	14.7855		-0.373367	-0.444769	-0.508488		10.764	10.8354	10.8991		1738.97	1827.2	1909.71	0.00238618	1825.29	85.3866
Ppia-/--Mock	24.8832	24.3679	24.6678		9.58924	9.0739	9.37375		0.801414	1.31675	1.0169		1.74281	2.49105	2.02356		2.08581	0.377983
Ppia-/--SeV	16.5575	15.9864	15.9826		1.26353	0.692401	0.688552		9.12712	9.69825	9.7021		559.16	830.738	832.957		740.952	157.44
actin				AVERAGE
WT-Mock	15.1628	15.4901	15.2292	15.294
WT-SeV	15.9417	15.8173	15.8483	15.8691
Ppia-/--Mock	15.0254	15.1066	15.1945	15.1088
Ppia-/--SeV	14.6026	14.8429	14.8012	14.7489

## Sheet: Figure 1G2
Ifit2 mRNA
	Ct	Ct	Ct		Ct-Ct0	Ct-Ct0	Ct-Ct0	AVERAGE	#NAME?				POWER			p	MEAN	SD
WT-Mock	30.3373	30.5014	30.053		15.0433	15.2074	14.759	15.0032	-0.0400785	-0.204183	0.244261		0.972602	0.86803	1.18449	0.55052	1.00837	0.161232
WT-SeV	21.6045	21.6827	21.5195		5.7354	5.81361	5.65036		9.26782	9.18961	9.35286		616.442	583.913	653.869	0.00099134	618.075	35.0063
Ppia-/--Mock	30.1787	29.9219	29.9173		15.0699	14.813	14.8085		-0.0666597	0.190186	0.194738		0.954846	1.14091	1.14452		1.08009	0.10848
Ppia-/--SeV	23.1118	23.1028	22.9109		8.36286	8.35393	8.16201		6.64036	6.64929	6.84121		99.7583	100.377	114.66		104.932	8.43032
actin				AVERAGE
WT-Mock	15.1628	15.4901	15.2292	15.294
WT-SeV	15.9417	15.8173	15.8483	15.8691
Ppia-/--Mock	15.0254	15.1066	15.1945	15.1088
Ppia-/--SeV	14.6026	14.8429	14.8012	14.7489

[truncated: 6 more sheets: Figure 1G3, Figure 1H1, Figure 1H2, Figure 1I1, Figure 1I2, Figure 1I3]
