# Supplementary material for: Cyclophilin A-regulated ubiquitination is critical for RIG-I-mediated antiviral immune responses
Source: eLife. 2017 Jun 8;6:e24425. doi: 10.7554/eLife.24425 (PMC5484619; doi:10.7554/eLife.24425)
Supplement: Figure 2—source data 1. — DOI: http://dx.doi.org/10.7554/eLife.24425.010 [file elife-24425-fig2-data1.xlsx]

## Sheet: Figure 2A
Survial
Time (d)	WT PBS	WT SeV	Ppia-/- PBS	Ppia-/- SeV
14	0
14	0
14	0
14	0
14	0
14		0
14		0
14		0
9		1
9		1
14			0
14			0
14			0
14			0
14			0
7				1
9				1
9				1
9				1
9				1

## Sheet: Figure 2B
Lung index
SeV Infection (day)	Lung Weight(g)				SeV Infection (day)	Body Weight(g)					Lung Index=Lung/Body*100
	WT PBS	WT SeV	Ppia-/- PBS	Ppia-/- SeV		WT PBS	WT SeV	Ppia-/- PBS	Ppia-/- SeV			WT PBS	WT SeV	Ppia-/- PBS	Ppia-/- SeV
2	0.14	0.15	0.1	0.13	2	22.3	20.47	16.21	16.69		2	0.627803	0.73278	0.616903	0.77891
	0.16	0.17	0.11	0.12		21.12	23.35	17.23	16.76			0.757576	0.728051	0.638421	0.71599
	0.14	0.17	0.12	0.14		20.19	20.6	17.49	18.32			0.693413	0.825243	0.686106	0.764192
	0.18	0.18	0.1	0.11		23.4	19.05	17.03	16.93			0.769231	0.944882	0.587199	0.649734
	0.13	0.19	0.12	0.14		18.77	23.54	17.36	17.55			0.692595	0.807137	0.691244	0.797721
											AVERAGE	0.708123	0.807618	0.643975	0.741309
											SD	0.0511637	0.0881531	0.044712	0.05947
7	0.16	0.2	0.1	0.27	7	22.86	16.64	16.87	13.18		7	0.699913	1.20192	0.592768	2.04856
	0.15	0.22	0.08	0.27		21.72	19.67	18.13	13.29			0.690608	1.11845	0.441258	2.0316
	0.14	0.22	0.08	0.28		20.79	16.96	18.37	15.44			0.673401	1.29717	0.435493	1.81347
	0.14	0.19	0.09	0.34		24.88	15.74	17.42	13.36			0.562701	1.20712	0.516648	2.54491
	0.15	0.28	0.1	0.29		19.82	19.6	18.04	14.29			0.756811	1.42857	0.554324	2.02939
											AVERAGE	0.676687	1.25065	0.508098	2.09359
											SD	0.0709872	0.117861	0.0691342	0.270254
											p				0.00425711

## Sheet: Figure 2E1
SeV NP mRNA
	h	Ct	Ct	Ct		Ct-Ct0	Ct-Ct0	Ct-Ct0	average	#NAME?				power 2			p	mean	SD
WT	0	40	40	40		17.6573	17.6573	17.6573	17.6573	3.84644e-06	3.84644e-06	3.84644e-06		1	1	1	#DIV/0!	1	0
	6	32.3958	33.3365	33.6446		8.58029	9.52101	9.8291		9.07699	8.13627	7.82818		540.065	281.359	227.256	0.395271	349.56	167.185
	12	31.4594	31.8368	31.7297		7.21716	7.59456	7.48743		10.4401	10.0627	10.1698		1389.27	1069.5	1151.94	0.00143431	1203.57	166.021
	24	33.9397	33.5975	33.5525		6.05456	5.71244	5.66745		11.6027	11.9448	11.9898		3110.05	3942.36	4067.24	0.00517448	3706.55	520.345
Ppia-/-	0	40	40	40		15.7578	15.7578	15.7578		1.89944	1.89944	1.89944		3.73067	3.73067	3.73067		3.73067	0
	6	32.8103	32.4557	32.7632		8.90216	8.5476	8.85506		8.75512	9.10968	8.80222		432.069	552.441	446.408		476.973	65.7493
	12	28.8684	28.8195	28.9556		4.82216	4.7733	4.9094		12.8351	12.884	12.7479		7307.28	7559.01	6878.49		7248.26	344.075
	24	31.0785	30.9127	30.732		4.74541	4.57962	4.39896		12.9119	13.0777	13.2583		7706.56	8645.06	9798.35		8716.66	1047.73
ACTIN					AVERAGE
WT	0	22.2916	22.3159	22.4207	22.3427
	6	23.7692	23.7595	23.9179	23.8155
	12	24.2848	24.1373	24.3048	24.2423
	24	27.9837	27.6436	28.0279	27.8851
Ppia-/-	0	24.2201	24.244	24.2624	24.2422
	6	23.8784	23.8055	24.0405	23.9081
	12	24.1085	24.0017	24.0284	24.0462
	24	26.0558	26.3049	26.6385	26.3331

## Sheet: Figure 2E2
SeV M mRNA
	h		Ct	Ct	Ct		Ct-Ct0	Ct-Ct0	Ct-Ct0	average	#NAME?				power 2			p	mean	SD
WT	0		40	40	40		17.8439	17.8439	17.8439	17.8439	3.88814e-06	3.88814e-06	3.88814e-06		1	1	1	#DIV/0!	1	0
	6		33.4599	33.4472	33.9315		9.90268	9.88994	10.3743		7.94125	7.95399	7.46966		245.784	247.965	177.253	0.0801782	223.667	266.817
	12		31.6584	31.5177	31.321		7.7048	7.56405	7.36734		10.1391	10.2799	10.4766		1127.67	1243.23	1424.85	0.474496	1265.25	279.148
	24		34.7907	34.3781	33.2664		6.94803	6.53536	5.42367		10.8959	11.3086	12.4203		1905.43	2536.4	5481.14	0.0381273	3307.66	908.546
Ppia-/-	0		40	40	40		15.8559	15.8559	15.8559		1.98804	1.98804	1.98804		3.96696	3.96696	3.96696		3.96696	0
	6		34.7819	34.8398	34.4099		11.1663	11.2243	10.7943		6.67758	6.61962	7.04959		102.365	98.3343	132.476		111.059	18.6573
	12		29.3337	29.0266	29.7448		5.61787	5.31069	6.02892		12.2261	12.5332	11.815		4790.83	5927.62	3603.06		4773.84	1162.38
	24		30.6397	30.8626	30.7404		4.53682	4.7597	4.63759		13.3071	13.0842	13.2063		10135.4	8684.53	9451.61		9423.83	525.813
ACTIN						AVERAGE
WT	0		22.3526	21.9748	22.1408	22.1561
	6		23.3203	23.8415	23.51	23.5573
	12		23.8135	24.0686	23.9789	23.9536
	24		28.1341	27.6157	27.7784	27.8427
Ppia-/-	0		23.9738	24.5614	23.8971	24.1441
	6		23.4982	23.6671	23.6813	23.6155
	12		23.6655	23.7478	23.7343	23.7159
	24		25.8065	25.9095	26.5925	26.1029

## Sheet: Figure 2F1
IFN-β
		Standard				pg/ml
			0.055	0.056	0.0555	0
			0.289	0.309	0.299	50
			0.589	0.609	0.599	100
			0.917	0.901	0.909	200
			1.765	1.748	1.7565	400
			2.671	2.688	2.6795	1000
			3.653	3.676	3.6645	2000
			5.12	5.126	5.123	4000
		Sample	h	OD			OD-BLANK			Con.(pg/ml)			AVERAGE	SD	p
		WT	0	0.103	0.104	0.102	0.0475	0.0485	0.0465	55.5677	55.5046	55.6312	55.5678	0.063287	0.0542333
			6	0.616	0.657	0.629	0.5605	0.6015	0.5735	66.6244	71.2646	68.0355	68.6415	2.37868	0.685954
			12	1.436	1.363	1.221	1.3805	1.3075	1.1655	265.068	238.384	191.525	231.659	37.2297	0.0240438
			24	1.924	1.806	1.864	1.8685	1.7505	1.8085	488.729	427.427	456.983	457.713	30.6577	0.00598928
		Ppia-/-	0	0.113	0.114	0.122	0.0575	0.0585	0.0665	54.9514	54.8916	54.425	54.756	0.288217
			6	0.642	0.667	0.527	0.5865	0.6115	0.4715	69.5025	72.4806	58.4654	66.8162	7.38366
			12	0.747	0.834	0.774	0.6915	0.7785	0.7185	83.4	97.6776	87.5631	89.5469	7.34264
			24	1.111	1.166	1.168	1.0555	1.1105	1.1125	159.811	175.168	175.745	170.242	9.03753

## Sheet: Figure 2F2
IFN-α
					0.0725	BLANK
				Standard		pg/ml
					0.069	0
					0.127	12.5
					0.21	25
					0.3975	50
					0.8555	100
					2.005	200
					3.8145	400
		Sample	h	OD			OD-BLANK			Con.(pg/ml)			AVERAGE	SD	p
		WT	0	0.117	0.115	0.105	0.0445	0.0425	0.0325	6.53738	6.33211	5.30577	6.05842	0.659848	0.416785
			6	0.507	0.686	0.594	0.4345	0.6135	0.5215	46.6156	65.0433	55.5695	55.7428	9.21509	0.0541786
			12	1.141	1.166	1.185	1.0685	1.0935	1.1125	111.978	114.561	116.524	114.354	2.27993	0.0541356
			24	1.955	1.846	2.107	1.8825	1.7735	2.0345	196.278	184.965	212.067	197.77	13.6125	0.0247457
		Ppia-/-	0	0.107	0.099	0.111	0.0345	0.0265	0.0385	5.51103	4.68999	5.92156	5.37419	0.627085
			6	0.356	0.325	0.226	0.2835	0.2525	0.1535	31.0865	27.9002	17.7288	25.5718	6.97657
			12	0.954	0.812	1.0107	0.8815	0.7395	0.9382	92.6721	78.0272	98.5234	89.7409	10.5578
			24	1.195	1.287	1.122	1.1225	1.2145	1.0495	117.557	127.067	110.015	118.213	8.54452

## Sheet: Figure 2G1
Ifnb1 mRNA
	h		Ct	Ct	Ct		Ct-Ct0	Ct-Ct0	Ct-Ct0	average	#NAME?				power 2			p	mean	SD
WT	0		31.7241	32.2233	31.0713		9.38133	9.88062	8.72857	9.33017	-0.0511567	-0.550449	0.601605		0.965162	0.682808	1.5174	0.768522	1.05512	0.424509
	6		30.8613	31.0155	31.6399		7.04575	7.2	7.82441		2.28442	2.13017	1.50576		4.8717	4.37768	2.83975	0.10048	4.02971	1.05972
	12		30.2774	30.2839	30.8853		6.03507	6.04167	6.64303		3.2951	3.2885	2.68714		9.81573	9.77096	6.44035	0.0283748	8.67568	1.93598
	24		31.4148	31.3348	31.1292		3.52967	3.44969	3.24408		5.8005	5.88048	6.08609		55.7344	58.9114	67.9351	0.00473169	60.8603	6.32955
Ppia-/-	0		33.4258	33.3432	33.3827		9.18369	9.10102	9.14057		0.146479	0.229149	0.189604		1.10686	1.17214	1.14045		1.13982	0.0326439
	6		32.7789	31.5624	32.895		8.87081	7.65424	8.9869		0.459362	1.67593	0.343273		1.37493	3.19524	1.26863		1.94627	1.08295
	12		32.4159	31.6322	32.2236		8.36965	7.58603	8.17744		0.960516	1.74414	1.15273		1.94601	3.34995	2.22334		2.50643	0.743552
	24		32.0055	32.1284	31.9194		5.67239	5.79529	5.5863		3.65778	3.53488	3.74387		12.6212	11.5906	13.3973		12.5364	0.90637
ACTIN						AVERAGE
WT	0		22.2916	22.3159	22.4207	22.3427
	6		23.7692	23.7595	23.9179	23.8155
	12		24.2848	24.1373	24.3048	24.2423
	24		27.9837	27.6436	28.0279	27.8851
Ppia-/-	0		24.2201	24.244	24.2624	24.2422
	6		23.8784	23.8055	24.0405	23.9081
	12		24.1085	24.0017	24.0284	24.0462
	24		26.0558	26.3049	26.6385	26.3331

## Sheet: Figure 2G2
Ifna mRNA
	h	Ct	Ct	Ct		Ct-Ct0	Ct-Ct0	Ct-Ct0	average	#NAME?				power 2			p	mean	SD
WT	0	32.6056	32.8701	34.2372		10.2629	10.5274	11.8944	10.8949	0.631996	0.367523	-0.999527		1.54971	1.29014	0.500164	0.459091	1.11334	0.546653
	6	31.9385	32.2349	31.8999		8.12298	8.41936	8.08433		2.77194	2.47556	2.81059		6.83027	5.56183	7.01569	0.118227	6.46926	0.791311
	12	30.0661	29.6619	29.5557		5.82379	5.4196	5.31344		5.07113	5.47532	5.58148		33.6172	44.4872	47.8843	0.047487	41.9962	7.45256
	24	32.394	32.4244	32.4634		4.50893	4.53932	4.57832		6.38599	6.3556	6.3166		83.6326	81.8889	79.7049	0.0254992	81.7421	1.96798
Ppia-/-	0	34.3676	34.9662	34.8891		10.1255	10.7241	10.647		0.769464	0.170839	0.247953		1.70464	1.12571	1.18752		1.33929	0.317905
	6	32.3176	32.7968	33.1614		8.40945	8.88867	9.25325		2.48547	2.00625	1.64167		5.60017	4.01736	3.12026		4.24593	1.25565
	12	30.594	30.6157	30.8633		6.54777	6.56948	6.81709		4.34715	4.32544	4.07783		20.3527	20.0488	16.8869		19.0961	1.9193
	24	31.2116	31.6464	31.5329		4.87856	5.31335	5.19983		6.01636	5.58157	5.69509		64.73	47.8873	51.8075		54.8083	8.8132
ACTIN					AVERAGE
WT	0	22.2916	22.3159	22.4207	22.3427
	6	23.7692	23.7595	23.9179	23.8155
	12	24.2848	24.1373	24.3048	24.2423
	24	27.9837	27.6436	28.0279	27.8851
Ppia-/-	0	24.2201	24.244	24.2624	24.2422
	6	23.8784	23.8055	24.0405	23.9081
	12	24.1085	24.0017	24.0284	24.0462
	24	26.0558	26.3049	26.6385	26.3331

## Sheet: Figure 2H1
Ifit1 mRNA
	h		Ct	Ct	Ct		Ct-Ct0	Ct-Ct0	Ct-Ct0	average	#NAME?				power 2			p	mean	SD
WT	0		31.7522	32.0188	32.3789		8.12375	8.39028	8.75042	8.42148	0.297736	0.0312032	-0.328939		1.22921	1.02186	0.796122	0.985098	1.01573	0.216611
	6		29.9051	30.3513	29.9303		5.32717	5.77342	5.35241		3.09431	2.64806	3.06908		8.54046	6.26826	8.39235	0.885214	7.73369	1.27126
	12		29.8351	30.0384	29.3526		4.3449	4.54825	3.86238		4.07658	3.87323	4.5591		16.8722	14.6541	23.5736	0.0577562	18.3666	4.64373
	24		30.4696	30.5479	30.5149		2.5001	2.57838	2.54541		5.92138	5.84311	5.87607		60.6057	57.405	58.732	0.00391438	58.9143	1.60812
Ppia-/-	0		33.9932	33.3817	33.297		8.85864	8.24711	8.16241		-0.437154	0.174375	0.259078		0.73859	1.12848	1.19671		1.02126	0.247165
	6		31.6709	30.6918	31.3842		6.02384	5.04475	5.73708		2.39765	3.37674	2.68441		5.26943	10.3872	6.42816		7.3616	2.68355
	12		29.1792	29.3804	28.7519		4.5019	4.7031	4.07453		3.91959	3.71838	4.34696		15.1326	13.1627	20.35		16.2151	3.71392
	24		31.4972	31.5862	31.2262		3.80694	3.89586	3.53585		4.61454	4.52562	4.88563		24.4971	23.0329	29.5612		25.6971	3.42556
ACTIN						AVERAGE
WT	0		23.4442	23.6024	23.8389	23.6285
	6		24.4447	24.6273	24.6616	24.5779
	12		25.4334	25.578	25.4591	25.4902
	24		27.9859	27.9327	27.9898	27.9695
Ppia-/-	0		25.0751	25.1179	25.2108	25.1346
	6		25.1109	25.0372	26.7931	25.6471
	12		24.637	24.9213	24.4737	24.6773
	24		27.7627	27.6657	27.6424	27.6903

## Sheet: Figure 2H2
Ifit2 mRNA
	h		Ct	Ct	Ct		Ct-Ct0	Ct-Ct0	Ct-Ct0	average	#NAME?				power 2			p	mean	SD
WT	0		31.6323	31.474	31.9606		8.0038	7.84556	8.33215	8.0605	0.0567044	0.214944	-0.271648		1.04009	1.16066	0.828373	0.138527	1.00971	0.168213
	6		31.0526	31.0084	31.0056		6.47468	6.43052	6.42766		1.58582	1.62998	1.63284		3.00178	3.09508	3.10123	0.671083	3.06603	0.0557283
	12		31.517	31.5018	31.4475		6.02684	6.01161	5.95731		2.03366	2.04889	2.10319		4.09444	4.13788	4.29658	0.956922	4.1763	0.106409
	24		32.1529	32.4008	32.2614		4.18342	4.43137	4.29197		3.87708	3.62913	3.76853		14.6932	12.373	13.6283	0.00577954	13.5648	1.1614
Ppia-/-	0		33.3892	33.8513	33.7952		8.25463	8.71666	8.66061		-0.194135	-0.656163	-0.600114		0.874097	0.634564	0.659702		0.722787	0.131639
	6		32.1124	31.847	32.9599		6.46528	6.1999	7.31283		1.59522	1.8606	0.747669		3.02141	3.63159	1.67908		2.77736	0.998875
	12		30.4539	30.7795	30.7958		5.7766	6.10215	6.11848		2.2839	1.95835	1.94202		4.86993	3.88618	3.84243		4.19951	0.581013
	24		33.0217	33.7032	33.9591		5.33142	6.01287	6.2688		2.72908	2.04763	1.7917		6.63035	4.13425	3.46222		4.74227	1.66929
ACTIN						AVERAGE
WT	0		23.4442	23.6024	23.8389	23.6285
	6		24.4447	24.6273	24.6616	24.5779
	12		25.4334	25.578	25.4591	25.4902
	24		27.9859	27.9327	27.9898	27.9695
Ppia-/-	0		25.0751	25.1179	25.2108	25.1346
	6		25.1109	25.0372	26.7931	25.6471
	12		24.637	24.9213	24.4737	24.6773
	24		27.7627	27.6657	27.6424	27.6903

[truncated: 1 more sheets: Figure 2H3]
