# Supplementary material for: Cyclophilin A-regulated ubiquitination is critical for RIG-I-mediated antiviral immune responses
Source: eLife. 2017 Jun 8;6:e24425. doi: 10.7554/eLife.24425 (PMC5484619; doi:10.7554/eLife.24425)
Supplement: Figure 3—source data 1. — DOI: http://dx.doi.org/10.7554/eLife.24425.013 [file elife-24425-fig3-data1.xls]

## Sheet: Figure 3A and 3B
ISRE-Luc and NF-κB-Luc
				CypA			Vector							β-gal				average
			ISRE-Mock	44180	43261	43179	39701	38399	39936				1	0.0951	0.099	0.0978	0.0992	0.097775
			ISRE-Sev	1240715	1203897	1346777	132804	142377	133809				1	0.1036	0.1096	0.1084	0.1083	0.107475
			NF-Kb-Mock	301131	355252	317080	300211	295311	316477				1	0.0951	0.0979	0.0998	0.0998	0.09815
			NF-Kb-SeV	4080449	3832456	4184548	911993	798595	891628				1	0.082	0.0819	0.0793	0.0794	0.08065
													1	0.0736	0.0737	0.0723	0.0782	0.07445
			AVERAGE	CypA			Vector			AVERAGE			1	0.0758	0.0796	0.0779	0.0774	0.077675
		ISRE-Mock/β-gal	431435	451854	402522	439929	492263	515769	514142	507391			2	0.0833	0.0826	0.0837	0.0868	0.0841
		ISRE-SeV/β-gal	1.36689e+07	1.47529e+07	1.20149e+07	1.42389e+07	1.08279e+06	1.32259e+06	1.26086e+06	1.22208e+06			2	0.0988	0.102	0.0989	0.1011	0.1002
				293T/CypA+			293T/CypA-						2	0.0818	0.0864	0.0865	0.0835	0.08455
		NF-κB-Mock/β-gal	3.66885e+06	3.42974e+06	3.86248e+06	3.71433e+06	3.27205e+06	3.11838e+06	4.2854e+06	3.55861e+06			2	0.1253	0.1244	0.1195	0.1214	0.12265
		NF-κB-SeV/β-gal	4.41165e+07	4.32939e+07	4.19191e+07	4.71366e+07	8.05648e+06	1.15991e+07	9.25645e+06	9.63733e+06			2	0.1051	0.1057	0.1107	0.1091	0.10765
													2	0.1041	0.105	0.1063	0.1091	0.106125
			AVERAGE	CypA			Vector			AVERAGE			3	0.0855	0.0896	0.0874	0.0887	0.0878
	fold	ISRE-Luc-Mock	1	1.04733	0.932984	1.01969	0.86704	1.01651	1.01331	0.965619			3	0.095	0.0953	0.0936	0.084	0.091975
		ISRE-Luc-SeV	31.6824	34.1949	27.8488	33.0036	2.13403	2.60665	2.48499	2.40856			3	0.0814	0.0813	0.0803	0.0803	0.080825
		NF-κB-Luc-Mock	1	0.934826	1.05278	1.0124	0.919474	0.876292	1.20423	1			3	0.0893	0.0926	0.0931	0.092	0.09175
		NF-κB-Luc-SeV	12.0246	11.8004	11.4257	12.8478	2.26394	3.25943	2.60114	2.70817			3	0.0925	0.0994	0.093	0.0939	0.0947
			CypA	Vector		p							3	0.0722	0.0734	0.0734	0.0764	0.07385
	SD	ISRE-Mock	0.0596606	0.0853867	SeV-	0.00493645							4	0.0936	0.0937	0.0943	0.0954	0.09425
		ISRE-SeV	3.37301	0.245406	SeV+								4	0.0914	0.0921	0.0924	0.0898	0.091425
		NF-κB-Mock	0.0599449	0.178185	SeV-	0.00426726							4	0.0866	0.0871	0.0885	0.0929	0.088775
		NF-κB-SeV	0.737083	0.506304	SeV+								4	0.112	0.1128	0.1132	0.1148	0.1132
													4	0.0674	0.068	0.0703	0.0697	0.06885
													4	0.0967	0.0957	0.096	0.0969	0.096325
