# Supplementary material for: Cyclophilin A-regulated ubiquitination is critical for RIG-I-mediated antiviral immune responses
Source: eLife. 2017 Jun 8;6:e24425. doi: 10.7554/eLife.24425 (PMC5484619; doi:10.7554/eLife.24425)
Supplement: Figure 4—source data 1. — DOI: http://dx.doi.org/10.7554/eLife.24425.015 [file elife-24425-fig4-data1.xls]

## Sheet: Figure 4A
IFN-β-Luc
			Vector			CypA					β-gal				average
		Control	417645	416750	419895	973922	1178444	1093832		1	0.112	0.117	0.118	0.118	0.11625
		Myc-MAVS	26506637	23466403	24886508	46095993	49755913	52900985		1	0.117	0.121	0.12	0.121	0.11975
		Flag-RIG-I-N	40898518	39203233	44729351	49274871	46900452	49304262		1	0.126	0.134	0.135	0.137	0.133
		Flag-MDA5-N	31846206	30442595	31181474	36723398	43086106	37591717		1	0.077	0.077	0.078	0.079	0.07775
		Flag-IRF3/5D	40468884	44460952	36462787	32439791	36448641	34447024		1	0.08	0.081	0.083	0.082	0.0815
		M-TBK1	135455168	103457853	105455838	86541274	95327994	90325707		1	0.075	0.078	0.077	0.078	0.077
		Control/β-gal	3.59265e+06	3.48017e+06	3.15711e+06	1.25263e+07	1.44594e+07	1.42056e+07		2	0.147	0.148	0.148	0.195	0.1595
		Myc-MAVS/β-gal	1.66186e+08	2.04992e+08	2.38662e+08	4.41321e+08	4.76475e+08	5.06836e+08		2	0.144	0.105	0.1045	0.1044	0.114475
		Flag-RIG-I-N/β-gal	3.51815e+08	3.27376e+08	3.36311e+08	6.3376e+08	5.75466e+08	6.40315e+08		2	0.1042	0.1043	0.1043	0.1043	0.104275
		Flag-MDA5-N/β-gal	1.76433e+08	194832608	2.49952e+08	363598000	3.91692e+08	3.58016e+08		2	0.1046	0.1043	0.1045	0.1044	0.10445
		Flag-IRF3/5D/β-gal	2.46386e+08	2.96406e+08	3.07703e+08	2.76672e+08	3.52161e+08	3.04841e+08		2	0.1044	0.1044	0.1045	0.1044	0.104425
		M-TBK1/β-gal	4.69515e+08	4.49328e+08	4.95098e+08	5.40883e+08	5.01726e+08	4.20609e+08		2	0.1043	0.1044	0.1045	0.1043	0.104375
	fold	Control	1.03232	1	0.907171	3.59935	4.15481	4.08188		3	0.112	0.117	0.118	0.118	0.11625
		Myc-MAVS	47.7523	58.9028	68.5778	126.81	136.912	145.635		3	0.117	0.121	0.12	0.121	0.11975
		Flag-RIG-I-N	101.091	94.0689	96.6364	182.106	165.356	183.99		3	0.126	0.134	0.135	0.137	0.133
		Flag-MDA5-N	50.6968	55.9837	71.8218	104.477	112.55	102.873		3	0.077	0.077	0.078	0.079	0.07775
		Flag-IRF3/5D	70.7971	85.1702	88.4161	79.4996	101.191	87.5938		3	0.08	0.081	0.083	0.082	0.0815
		M-TBK1	134.912	129.111	142.263	155.419	144.167	120.859		3	0.075	0.078	0.077	0.078	0.077
	AVERAGE	Control	0.97983	3.94534						4	0.174	0.183	0.183	0.182	0.1805
		Myc-MAVS	58.411	136.452						4	0.15	0.154	0.159	0.162	0.15625
		Flag-RIG-I-N	97.2656	177.151						4	0.124	0.127	0.124	0.124	0.12475
		Flag-MDA5-N	59.5007	106.633						4	0.095	0.115	0.098	0.096	0.101
		Flag-IRF3/5D	81.4611	89.4281						4	0.105	0.109	0.113	0.113	0.11
		M-TBK1	135.429	140.148						4	0.105	0.106	0.106	0.103	0.105
	SD	Control	0.0649669	0.301854						5	0.157	0.168	0.17	0.162	0.16425
		Myc-MAVS	10.4215	9.42097						5	0.144	0.151	0.155	0.15	0.15
		Flag-RIG-I-N	3.55329	10.258						5	0.123	0.118	0.121	0.112	0.1185
		Flag-MDA5-N	10.9929	5.18606						5	0.112	0.123	0.126	0.108	0.11725
		Flag-IRF3/5D	9.37681	10.9613						5	0.098	0.107	0.104	0.105	0.1035
		M-TBK1	6.59097	17.627						5	0.115	0.112	0.111	0.114	0.113
	p	Control	0.00448744							6	0.271	0.292	0.295	0.296	0.2885
		Myc-MAVS	5.47929e-05							6	0.231	0.237	0.237	0.216	0.23025
		Flag-RIG-I-N	0.00340335							6	0.207	0.217	0.216	0.212	0.213
		Flag-MDA5-N	0.0281578							6	0.155	0.163	0.164	0.158	0.16
		Flag-IRF3/5D	0.243893							6	0.183	0.188	0.192	0.197	0.19
		M-TBK1	0.754117							6	0.203	0.22	0.22	0.216	0.21475

## Sheet: Figure 4B
ISRE-Luc
			Vector			CypA					β-gal				average
		Control	417645	416750	419895	973922	1178444	1093832		1	0.112	0.117	0.118	0.118	0.11625
		Myc-MAVS	106388868	93723024	90949480	139385698	166832094	164965220		1	0.117	0.121	0.12	0.121	0.11975
		Flag-RIG-I-N	78108080	76672323	70232093	104747404	133610828	107952760		1	0.126	0.134	0.135	0.137	0.133
		Flag-MDA5-N	39604280	34359173	35879357	70274841	72337967	81654476		1	0.077	0.077	0.078	0.079	0.07775
		Flag-IRF3/5D	9005912	10107902	10974707	9034980	8087562	9299571		1	0.08	0.081	0.083	0.082	0.0815
		M-TBK1	265455168	243457853	205455838	166541274	185327994	170325707		1	0.075	0.078	0.077	0.078	0.077
		Control/β-gal	3.59265e+06	3.48017e+06	3.15711e+06	1.25263e+07	1.44594e+07	1.42056e+07	3.40997e+06	2	0.197	0.208	0.203	0.21	0.2045
		Myc-MAVS/β-gal	5.20239e+08	499856128	5.212e+08	1.06401e+09	1.13685e+09	1.05409e+09		2	0.179	0.189	0.189	0.193	0.1875
		Flag-RIG-I-N/β-gal	3.64991e+08	421276500	4.88571e+08	7.27413e+08	8.41643e+08	8.65353e+08		2	0.172	0.176	0.179	0.171	0.1745
		Flag-MDA5-N/β-gal	2.33309e+08	2.38192e+08	2.32605e+08	6.6141e+08	5.77549e+08	7.147e+08		2	0.124	0.131	0.132	0.137	0.131
		Flag-IRF3/5D/β-gal	4.09825e+07	4.09641e+07	6.1397e+07	4.74277e+07	4.059e+07	8.22971e+07		2	0.146	0.154	0.145	0.142	0.14675
		M-TBK1/β-gal	9.20122e+08	1.05736e+09	9.64581e+08	1.04088e+09	9.7541e+08	1.01535e+09		2	0.167	0.153	0.154	0.152	0.1565
	fold	Control	1.05357	1.02059	0.925845	3.67344	4.24034	4.1659		3	0.204	0.215	0.218	0.219	0.214
		Myc-MAVS	152.564	146.587	152.846	312.03	333.389	309.12		3	0.172	0.187	0.185	0.184	0.182
		Flag-RIG-I-N	107.036	123.542	143.277	213.319	246.818	253.771		3	0.137	0.146	0.144	0.148	0.14375
		Flag-MDA5-N	68.4197	69.8515	68.2132	193.964	169.37	209.591		3	0.14	0.147	0.145	0.144	0.144
		Flag-IRF3/5D	12.0184	12.013	18.0051	13.9085	11.9033	24.1342		3	0.145	0.168	0.16	0.162	0.15875
		M-TBK1	269.833	310.08	282.871	305.247	286.046	297.76		3	0.121	0.126	0.124	0.128	0.12475
	AVERAGE	Control	1	4.02656						4	0.173	0.166	0.166	0.174	0.16975
		Myc-MAVS	150.665	318.179						4	0.138	0.142	0.148	0.149	0.14425
		Flag-RIG-I-N	124.619	237.969						4	0.156	0.152	0.153	0.156	0.15425
		Flag-MDA5-N	68.8282	190.975						4	0.1	0.104	0.103	0.118	0.10625
		Flag-IRF3/5D	14.0122	16.6487						4	0.124	0.126	0.127	0.124	0.12525
		M-TBK1	287.594	296.351						4	0.114	0.116	0.109	0.118	0.11425
	SD	Control	0.0663042	0.308067						5	0.23	0.234	0.209	0.206	0.21975
		Myc-MAVS	3.53527	13.2515						5	0.228	0.238	0.292	0.229	0.24675
		Flag-RIG-I-N	18.1443	21.629						5	0.174	0.183	0.177	0.181	0.17875
		Flag-MDA5-N	0.89226	20.2762						5	0.189	0.192	0.182	0.199	0.1905
		Flag-IRF3/5D	3.45797	6.55974						5	0.209	0.188	0.193	0.207	0.19925
		M-TBK1	20.5351	9.6774						5	0.115	0.112	0.111	0.114	0.113
	p	Control	0.00448744							6	0.271	0.292	0.295	0.296	0.2885
		Myc-MAVS	0.00332802							6	0.231	0.237	0.237	0.216	0.23025
		Flag-RIG-I-N	0.00202546							6	0.207	0.217	0.216	0.212	0.213
		Flag-MDA5-N	0.00983298							6	0.155	0.163	0.164	0.158	0.16
		Flag-IRF3/5D	0.28813							6	0.183	0.188	0.192	0.197	0.19
		M-TBK1	0.665293							6	0.167	0.172	0.164	0.168	0.16775

## Sheet: Figure 4C
NF-κB-Luc
			Vector			CypA					β-gal				average
		Control	417645	416507	435545	620581	620543	650541		1	1.379	1.457	1.455	1.401	1.423
		Myc-MAVS	2604280	2351973	2679357	5574841	4337967	4654476		1	1.193	1.257	1.311	1.11	1.21775
		Flag-RIG-I-N	6650547	6347479	7100064	16476287	14399397	13857881		1	1.243	1.305	1.403	1.26	1.30275
		Flag-MDA5-N	5509977	5183944	6509473	9420244	9839494	9189142		1	1.317	1.408	1.466	1.424	1.40375
		Flag-IRF3/5D	1884283	1683284	1700587	1410847	1315548	1103241		1	1.381	1.479	1.543	1.514	1.47925
		M-TBK1	5705912	5807902	6074707	6534980	6087562	5899571		1	1.308	1.359	1.298	1.323	1.322
		Control/β-gal	293496	342030	334327	442088	419498	492089	323284	2	0.145	0.168	0.16	0.162	0.15875
		Myc-MAVS/β-gal	1.64049e+07	1.88535e+07	1.57841e+07	3.86471e+07	4.16112e+07	4.38068e+07		2	0.121	0.126	0.124	0.128	0.12475
		Flag-RIG-I-N/β-gal	1.14369e+07	8.47743e+06	9.90246e+06	2.29715e+07	2.19252e+07	2.37191e+07		2	0.173	0.166	0.166	0.174	0.16975
		Flag-MDA5-N/β-gal	5.63969e+06	5.47407e+06	6.02869e+06	1.15338e+07	1.18655e+07	1.32075e+07		2	0.138	0.142	0.148	0.149	0.14425
		Flag-IRF3/5D/β-gal	6.26528e+06	5.35651e+06	4.08059e+06	5.28407e+06	5481450	4.82291e+06		2	0.106	0.102	0.103	0.106	0.10425
		M-TBK1/β-gal	3.05537e+07	3.37179e+07	2.76437e+07	2.64842e+07	3.40563e+07	3.09689e+07		2	0.1	0.104	0.103	0.118	0.10625
	fold	Control	0.907857	1.05798	1.03416	1.36749	1.29761	1.52215		3	0.567	0.598	0.582	0.579	0.5815
		Myc-MAVS	50.7445	58.3186	48.8243	119.545	128.714	135.506		3	0.727	0.75	0.736	0.782	0.74875
		Flag-RIG-I-N	35.3771	26.2228	30.6308	71.0565	67.8202	73.3691		3	0.701	0.711	0.735	0.721	0.717
		Flag-MDA5-N	17.445	16.9327	18.6482	35.677	36.7031	40.8542		3	0.683	0.738	0.732	0.716	0.71725
		Flag-IRF3/5D	19.3801	16.569	12.6223	16.345	16.9555	14.9185		3	0.63	0.653	0.673	0.671	0.65675
		M-TBK1	94.5104	104.298	85.5089	81.9223	105.345	95.7945		3	0.55	0.599	0.581	0.607	0.58425
	AVERAGE	Control	1	1.39575						4	0.919	1.056	0.972	0.961	0.977
		Myc-MAVS	52.6291	127.921						4	0.902	0.981	0.97	0.935	0.947
		Flag-RIG-I-N	30.7436	70.7486						4	1.043	1.089	1.129	1.058	1.07975
		Flag-MDA5-N	17.6753	37.7448						4	0.857	0.8	0.815	0.795	0.81675
		Flag-IRF3/5D	16.1905	16.073						4	0.781	0.824	0.848	0.864	0.82925
		M-TBK1	94.7724	94.3538						4	0.648	0.699	0.722	0.714	0.69575
	SD	Control	0.0806824	0.114907						5	0.29	0.305	0.3	0.308	0.30075
		Myc-MAVS	5.01988	8.00966						5	0.307	0.33	0.317	0.303	0.31425
		Flag-RIG-I-N	4.5782	2.78722						5	0.386	0.418	0.428	0.435	0.41675
		Flag-MDA5-N	0.880668	2.74131						5	0.268	0.263	0.285	0.252	0.267
		Flag-IRF3/5D	3.39476	1.04539						5	0.224	0.244	0.25	0.242	0.24
		M-TBK1	9.39717	11.7774						5	0.222	0.225	0.238	0.23	0.22875
	p	Control	0.0371564							6	0.184	0.187	0.192	0.184	0.18675
		Myc-MAVS	0.00570817							6	0.164	0.176	0.169	0.18	0.17225
		Flag-RIG-I-N	0.00297734							6	0.23	0.234	0.209	0.206	0.21975
		Flag-MDA5-N	0.0033064							6	0.228	0.238	0.292	0.229	0.24675
		Flag-IRF3/5D	0.946801							6	0.174	0.183	0.177	0.181	0.17875
		M-TBK1	0.955495							6	0.189	0.192	0.182	0.199	0.1905
