# Supplementary material for: Cyclophilin A-regulated ubiquitination is critical for RIG-I-mediated antiviral immune responses
Source: eLife. 2017 Jun 8;6:e24425. doi: 10.7554/eLife.24425 (PMC5484619; doi:10.7554/eLife.24425)
Supplement: Figure 7—source data 1. — DOI: http://dx.doi.org/10.7554/eLife.24425.019 [file elife-24425-fig7-data1.xls]

## Sheet: Figure 7A
IFN-β-Luc
			Vector			CypA					β-gal				average
Mock		Control	417645	416750	419895	973922	1178444	1093832		1	0.112	0.117	0.118	0.118	0.11625
SeV		Myc-TRIM25	11530899	11725648	10477825	49207603	51176290	44260600		1	0.117	0.121	0.12	0.121	0.11975
		Flag-Smurf1	26763079	24637573	26495704	43913216	41696954	45106299		1	0.126	0.134	0.135	0.137	0.133
		Flag-AIP4	16819752	18951687	18689142	23747999	18074714	19266184		1	0.077	0.077	0.078	0.079	0.07775
		Flag-RNF5	17256509	18275465	16240385	22301468	25289296	23938624		1	0.08	0.081	0.083	0.082	0.0815
		Flag-RNF125	23455609	21394465	22469606	18278468	18309296	19373331		1	0.075	0.078	0.077	0.078	0.077
		Control/β-gal	3.59265e+06	3.48017e+06	3.15711e+06	1.25263e+07	1.44594e+07	1.42056e+07		2	0.119	0.106	0.105	0.107	0.10925
		Myc-TRIM25/β-gal	1.05546e+08	7.99022e+07	1.04517e+08	2.06321e+08	1.92211e+08	2.29925e+08		2	0.129	0.155	0.153	0.15	0.14675
		Flag-Smurf1/β-gal	1.06732e+08	8.807e+07	1.04726e+08	1.39962e+08	1.49585e+08	1.80245e+08		2	0.097	0.102	0.103	0.099	0.10025
		Flag-AIP4/β-gal	140164600	1.02028e+08	1.38438e+08	1.35509e+08	1.42883e+08	1.62242e+08		2	0.224	0.237	0.245	0.248	0.2385
		Flag-RNF5/β-gal	5.9454e+07	7.63865e+07	8.76674e+07	8.61061e+07	9.88829e+07	1.37578e+08		2	0.249	0.278	0.269	0.269	0.26625
		Flag-RNF125/β-gal	9.05622e+07	8.36538e+07	1.29136e+08	8.74568e+07	9.75196e+07	1.1831e+08		2	0.184	0.189	0.195	0.202	0.1925
	fold	Control	1.03232	1	0.907171	3.59935	4.15481	4.08188		3	0.23	0.26	0.258	0.255	0.25075
		Myc-TRIM25	30.3279	22.9593	30.0322	59.2849	55.2305	66.0673		3	0.267	0.281	0.294	0.277	0.27975
		Flag-Smurf1	30.6687	25.3062	30.0923	40.2172	42.9823	51.792		3	0.239	0.262	0.258	0.253	0.253
		Flag-AIP4	40.2753	29.317	39.7792	38.9376	41.0564	46.6189		3	0.295	0.318	0.321	0.321	0.31375
		Flag-RNF5	17.0836	21.9491	25.1906	24.7419	28.4133	39.5321		3	0.265	0.277	0.285	0.288	0.27875
		Flag-RNF125	26.0224	24.0373	37.1062	25.1301	28.0215	33.9956		3	0.238	0.257	0.254	0.252	0.25025
	AVERAGE	Control	0.97983	3.94534						4	0.117	0.12	0.124	0.119	0.12
		Myc-TRIM25	27.7731	60.1942						4	0.176	0.196	0.191	0.18	0.18575
		Flag-Smurf1	28.6891	44.9972						4	0.129	0.14	0.139	0.132	0.135
		Flag-AIP4	36.4571	42.2043						4	0.17	0.177	0.175	0.179	0.17525
		Flag-RNF5	21.4078	30.8958						4	0.121	0.128	0.128	0.129	0.1265
		Flag-RNF125	29.0553	29.0491						4	0.116	0.117	0.12	0.122	0.11875
	SD	Control	0.0649669	0.301854						5	0.277	0.293	0.292	0.299	0.29025
		Myc-TRIM25	4.1715	5.47532						5	0.215	0.243	0.255	0.244	0.23925
		Flag-Smurf1	2.94375	6.04477						5	0.174	0.184	0.187	0.196	0.18525
		Flag-AIP4	6.18853	3.96723						5	0.247	0.252	0.273	0.264	0.259
		Flag-RNF5	4.08048	7.70126						5	0.246	0.253	0.261	0.263	0.25575
		Flag-RNF125	7.04257	4.52122						5	0.17	0.171	0.175	0.18	0.174
	p	Control	0.00448744							6	0.247	0.252	0.273	0.264	0.259
		Myc-TRIM25	0.00395368							6	0.246	0.253	0.261	0.263	0.25575
		Flag-Smurf1	0.0448204							6	0.17	0.171	0.175	0.18	0.174
		Flag-AIP4	0.270865							6	0.202	0.214	0.237	0.183	0.209
		Flag-RNF5	0.0607239							6	0.179	0.191	0.189	0.192	0.18775
		Flag-RNF125	0.997901							6	0.158	0.166	0.166	0.165	0.16375

## Sheet: Figure 7J
IFNB mRNA
		Ct	Ct	Ct		Ct-Ct0	Ct-Ct0	Ct-Ct0	average	#NAME?				power 2				mean2	SD	P
Ctrl	Vector	28.824	28.7679	28.9168		16.2449	16.1888	16.3377	16.2572	0.0122159	0.0683435	-0.0805594		1.0085	1.04851	0.945691		1.0009	0.0518303	0.515228
	RIG-I	22.3937	22.5126	22.679		9.1589	9.27775	9.44412		7.09826	6.97941	6.81304		137.021	126.186	112.442		125.217	12.318	0.00547221
	RIG-I +BAY	25.5761	25.398	25.1399		10.2937	10.1157	9.85751		5.96342	6.1415	6.39965		62.3975	70.5954	84.4281		72.4737	11.1348	0.0160678
	MAVS	22.4012	22.4788	22.4165		8.53189	8.60945	8.54718		7.72527	7.64771	7.70998		211.611	200.535	209.38		207.175	5.85812	0.00058541
	MAVS+BAY	26.388	26.233	26.4389		10.8118	10.6569	10.8627		5.44532	5.60028	5.39446		43.5717	48.5123	42.0625		44.7155	3.3736	0.00868448
CypA-RNAi	Vector	31.6366	31.8465	31.6116		16.1097	16.3196	16.0847	16.1713	0.147414	-0.0624259	0.172444		1.10758	0.957652	1.12697		1.06407	0.0926658
	RIG-I	26.2122	26.3985	26.2898		11.067	11.2534	11.1446		5.19013	5.00377	5.11255		36.5076	32.0838	34.5964		34.3959	2.2187
	RIG-I +BAY	25.6686	25.6074	25.8605		12.1503	12.0891	12.3422		4.10683	4.16809	3.91498		17.2297	17.9771	15.0844		16.7637	1.50159
	MAVS	23.6884	23.6568	23.6251		10.4132	10.3816	10.3499		5.84399	5.87557	5.90726		57.4403	58.7113	60.0155		58.7224	1.28765
	MAVS+BAY	26.559	26.4615	26.3273		12.1119	12.0144	11.8802		4.14527	4.24272	4.37699		17.695	18.9315	20.7781		19.1349	1.5516
GAPDH						average
Ctrl	Vector	12.8474	12.4027	12.4872		12.5791
	RIG-I	13.2449	13.3647	13.095		13.2348
	RIG-I +BAY	15.0794	15.3453	15.4224		15.2824
	MAVS	13.9589	13.9715	13.6775		13.8693
	MAVS+BAY	15.6741	15.5569	15.4975		15.5762
CypA-RNAi	Vector	15.5411	15.5174	15.5221		15.5269
	RIG-I	15.1443	15.0728	15.2184		15.1452
	RIG-I +BAY	13.4583	13.4709	13.6257		13.5183
	MAVS	13.3177	13.3022	13.2057		13.2752
	MAVS+BAY	14.4872	14.4184	14.4357		14.4471

## Sheet: Figure 7K
SeV M mRNA
		Ct	Ct	Ct		Ct-Ct0	Ct-Ct0	Ct-Ct0	average	#NAME?				power 2				mean2	SD	P
Ctrl	Vector	17.3656	17.4571	17.5959		2.95697	3.0484	3.18723	3.0642	0.10723	0.0158003	-0.12303		1.07716	1.01101	0.918257		1.00214	0.079821	0.00258752
	RIG-I	18.8784	18.9369	18.8785		4.8274	4.8859	4.82747		-1.76321	-1.8217	-1.76327		0.294593	0.282887	0.294579		0.290686	0.00675444	0.00292534
	RIG-I +BAY	19.2866	19.1185	19.1831		4.56018	4.39206	4.4567		-1.49599	-1.32786	-1.3925		0.354539	0.398359	0.380904		0.377934	0.0220605	0.00146737
	MAVS	20.3294	20.3452	20.2632		5.74191	5.75769	5.6757		-2.67771	-2.69349	-2.6115		0.156289	0.154589	0.163629		0.158169	0.00480396	0.0090523
	MAVS+BAY	21.1365	21.3329	21.0138		5.24311	5.4395	5.12049		-2.17892	-2.3753	-2.05629		0.220842	0.192736	0.240433		0.218004	0.0239746	0.0047125
CypA-RNAi	Vector	15.889	15.9176	15.8595		1.87158	1.90015	1.84205		1.19262	1.16404	1.22215		2.28567	2.24085	2.33294		2.28649	0.0460504
	RIG-I	18.4672	18.3749	18.328		3.77459	3.68222	3.63535		-0.710398	-0.618028	-0.57115		0.611152	0.651561	0.67308		0.645264	0.0314407
	RIG-I +BAY	20.1167	19.9461	20.0647		3.15885	2.9882	3.10676		-0.0946512	0.0760012	-0.0425642		0.936499	1.05409	0.970928		0.987173	0.0604566
	MAVS	20.8778	20.8156	21.0529		4.43629	4.37413	4.61139		-1.3721	-1.30993	-1.5472		0.386329	0.403339	0.342174		0.377281	0.0315703
	MAVS+BAY	18.3543	18.588	18.4925		3.80367	4.03737	3.94188		-0.739477	-0.973176	-0.877686		0.598957	0.509383	0.54424		0.55086	0.0451521
GAPDH						average
control	Vector	14.6433	14.3513	14.2315		14.4087
	RIG-I	14.0601	13.9552	14.1377		14.051
	RIG-I +BAY	14.8916	14.6498	14.6378		14.7264
	MAVS	14.6157	14.5763	14.5705		14.5875
	MAVS+BAY	15.7928	15.9641	15.9232		15.8934
CypA-RNAi	Vector	14.0389	14.0032	14.0103		14.0174
	RIG-I	14.7337	14.632	14.7122		14.6926
	RIG-I +BAY	17.0098	16.861	17.0029		16.9579
	MAVS	16.344	16.5007	16.4797		16.4415
	MAVS+BAY	14.5399	14.5516	14.5602		14.5506
